# Supplementary material
Source: PubMed Central journal article supplement (PMC3237231)
Supplement: supp_jn.111.147595_nut_147595_ST1.pdf [file supp_jn.111.147595_nut_147595_ST1.pdf]

Online Supporting Material

Supplemental Table. Stable carbon and nitrogen isotope ratios of traditional and non-traditional, market foods, by isotopic food group<sup>1</sup>.

| Food Name                 | Food Group          | <i>n</i> | $\delta^{15}\text{N}$ | $\delta^{13}\text{C}$ |
|---------------------------|---------------------|----------|-----------------------|-----------------------|
| <u>Traditional foods</u>  |                     |          |                       |                       |
| Akutaq <sup>2</sup>       | Mixed               | 3        | 2.0 ± 1.8             | -24.2 ± 4.8           |
| Blackfish <sup>3</sup>    | Aquatic             | 1        | 8.5                   | -27.8                 |
| Dolly varden <sup>3</sup> | Aquatic             | 3        | 16.1 ± 0.4            | -19.4 ± 0.2           |
| Flounder                  | Aquatic             | 2        | 14.5 ± 1.0            | -20.3 ± 1.3           |
| Halibut                   | Aquatic             | 4        | 17.0 ± 1.3            | -17.2 ± 0.3           |
| Herring                   | Aquatic             | 12       | 14.5 ± 2.1            | -20.0 ± 1.0           |
| Herring eggs              | Aquatic             | 5        | 16.0 ± 2.3            | -20.0 ± 0.8           |
| King salmon               | Aquatic             | 8        | 13.2 ± 0.6            | -22.2 ± 1.4           |
| Burbot <sup>3</sup>       | Aquatic             | 2        | 16.9 ± 0.1            | -21.6 ± 1.3           |
| Needle fish <sup>3</sup>  | Aquatic             | 1        | 10.2                  | -25.9                 |
| Pike <sup>3</sup>         | Aquatic             | 8        | 10.6 ± 2.1            | -25.3 ± 2.9           |
| Salmon <sup>4</sup>       | Aquatic             | 15       | 11.3 ± 1.0            | -21.3 ± 1.1           |
| Seal                      | Aquatic             | 9        | 15.7 ± 2.6            | -20.0 ± 2.2           |
| Seal oil <sup>5</sup>     | Aquatic             | 3        | -                     | -24.5 ± 0.6           |
| Seaweed                   | Aquatic             | 1        | 11.5                  | -16.0                 |
| Smelt                     | Aquatic             | 4        | 17.1 ± 0.4            | -19.7 ± 0.8           |
| Stink fish <sup>6</sup>   | Aquatic             | 1        | 13.1                  | -23.2                 |
| Tomcod                    | Aquatic             | 4        | 18.2 ± 1.0            | -18.7 ± 0.6           |
| Trout <sup>3</sup>        | Aquatic             | 1        | 16.5                  | -18.7                 |
| Whitefish <sup>3</sup>    | Aquatic             | 2        | 8.7 ± 1.4             | -23.9 ± 3.4           |
| Bear                      | Terrestrial Animals | 1        | 10.8                  | -21.6                 |
| Caribou <sup>4</sup>      | Terrestrial Animals | 11       | 3.2 ± 1.0             | -23.4 ± 1.3           |
| Moose <sup>4</sup>        | Terrestrial Animals | 6        | 2.6 ± 1.7             | -25.9 ± 0.9           |

Online Supporting Material

|                            |                     |   |            |             |
|----------------------------|---------------------|---|------------|-------------|
| Moose fat                  | Terrestrial Animals | 1 | -1.7       | -31.9       |
| Muskox                     | Terrestrial Animals | 2 | 2.5 ± 0.4  | -24.5 ± 0.3 |
| Ptarmigan                  | Terrestrial Animals | 2 | 4.6 ± 3.8  | -19.8 ± 5.3 |
| Beach greens               | Terrestrial Plants  | 4 | 2.6 ± 3.5  | -27.5 ± 0.7 |
| Blackberries               | Terrestrial Plants  | 3 | -1.5 ± 2.4 | -24.8 ± 1.2 |
| Buttercup                  | Terrestrial Plants  | 4 | 1.8 ± 1.0  | -26.2 ± 0.9 |
| Crowberry <sup>5</sup>     | Terrestrial Plants  | 1 | -          | -26.2       |
| Mouse food <sup>7</sup>    | Terrestrial Plants  | 2 | -1.6 ± 1.2 | -27.2 ± 0.4 |
| Pond plant                 | Terrestrial Plants  | 1 | -0.6       | -31.0       |
| Salmonberries              | Terrestrial Plants  | 5 | 1.1 ± 1.0  | -25.3 ± 0.9 |
| Sourdock                   | Terrestrial Plants  | 1 | 2.8        | -28.9       |
| Stinkweed                  | Terrestrial Plants  | 1 | -2.7       | -29.3       |
| Tundra tea                 | Terrestrial Plants  | 3 | -3.6 ± 2.5 | -27.1 ± 1.0 |
| Unknown fruits             | Terrestrial Plants  | 1 | -0.8       | -28.1       |
| Crane                      | Waterfowl           | 1 | 6.8        | -22.9       |
| Duck                       | Waterfowl           | 1 | 11.1       | -20.5       |
| Goose                      | Waterfowl           | 8 | 7.0 ± 4.2  | -25.8 ± 2.5 |
| Goose gizzard              | Waterfowl           | 2 | 4.7 ± 3.1  | -24.2 ± 1.7 |
| Swan                       | Waterfowl           | 3 | 7.1 ± 0.4  | -19.9 ± 0.2 |
| Waterfowl (unknown)        | Waterfowl           | 1 | 7.3        | -29.5       |
| <u>Market foods</u>        |                     |   |            |             |
| Corn chips                 | Corn and Cane Sugar | 3 | 3.4 ± 1.4  | -14.6 ± 1.2 |
| Diet Soda <sup>5</sup>     | Corn and Cane Sugar | 1 | -          | -11.4       |
| Ketchup                    | Corn and Cane Sugar | 3 | 4.0        | -14.3 ± 1.0 |
| Pancake syrup <sup>5</sup> | Corn and Cane Sugar | 1 | -          | -11.2       |
| Preserves <sup>5</sup>     | Corn and Cane Sugar | 1 | -          | -12.8       |

Online Supporting Material

|                                     |                       |   |            |             |
|-------------------------------------|-----------------------|---|------------|-------------|
| Soda <sup>4,5</sup>                 | Corn and Cane Sugar   | 9 | -          | -11.1 ± 0.5 |
| Sugar                               | Corn and Cane Sugar   | 3 | 4.6        | -11.8 ± 0.1 |
| Sugar-based candy <sup>5</sup>      | Corn and Cane Sugar   | 1 | -          | -12.1       |
| Tang <sup>4,5</sup>                 | Corn and Cane Sugar   | 4 | -          | -12.0 ± 0.4 |
| Cheese                              | Dairy                 | 1 | 4.9        | -22.3       |
| Milk                                | Dairy                 | 6 | 4.1 ± 0.3  | -20.5 ± 1.2 |
| Bread                               | Grains and Vegetables | 2 | 1.5 ± 1.9  | -24.3 ± 0.4 |
| Cakes and cookies                   | Grains and Vegetables | 2 | 2.9 ± 1.4  | -26.0 ± 1.7 |
| Cereals                             | Grains and Vegetables | 3 | 1.4 ± 2.6  | -25.3 ± 0.5 |
| Condiments <sup>8</sup>             | Grains and Vegetables | 3 | 2.9 ± 2.7  | -27.5 ± 2.5 |
| Honey                               | Grains and Vegetables | 1 | 5.0        | -25.8       |
| Margarine                           | Grains and Vegetables | 1 | 1.6        | -30.8       |
| Fruits                              | Grains and Vegetables | 4 | 3.5 ± 0.6  | -23.8 ± 2.9 |
| Vegetables                          | Grains and Vegetables | 4 | 0.4 ± 2.5  | -25.1 ± 0.9 |
| Nuts                                | Grains and Vegetables | 1 | -0.5       | -27.7       |
| Oils                                | Grains and Vegetables | 3 | -2.6       | -28.8 ± 1.4 |
| Pasta <sup>4</sup>                  | Grains and Vegetables | 3 | 1.8 ± 0.2  | -24.6 ± 0.5 |
| Pilot cracker <sup>4</sup>          | Grains and Vegetables | 3 | 3.4 ± 0.3  | -27.3 ± 0.6 |
| Potato chips                        | Grains and Vegetables | 3 | 3.7 ± 1.7  | -26.9 ± 1.3 |
| Rice <sup>4</sup>                   | Grains and Vegetables | 6 | 2.9 ± 2.1  | -26.8 ± 0.4 |
| Vegetable shortening <sup>4,5</sup> | Grains and Vegetables | 3 | -          | -30.1 ± 0.1 |
| Beef <sup>4</sup>                   | Meats                 | 4 | 5.2 ± 1.2  | -17.0 ± 4.4 |
| Chicken <sup>4</sup>                | Meats                 | 2 | 1.9 ± 0.9  | -17.2 ± 0.8 |
| Eggs                                | Meats                 | 1 | 5.0        | -18.5       |
| Pork                                | Meats                 | 3 | 3.2 ± 1.2  | -15.3 ± 0.5 |
| Turkey <sup>4</sup>                 | Meats                 | 2 | 3.0 ± 0.3  | -17.9 ± 0.7 |
| Candy                               | Mixed                 | 2 | -1.8 ± 8.0 | -21.6 ± 2.6 |

## Online Supporting Material

|                        |       |   |           |             |
|------------------------|-------|---|-----------|-------------|
| Canned fruits          | Mixed | 1 | 3.9       | -22.8       |
| Creamer <sup>5</sup>   | Mixed | 3 | -         | -19.7 ± 2.0 |
| Ice cream              | Mixed | 1 | 4.6       | -20.9       |
| Kool aid               | Mixed | 1 | 3.4       | -24.7       |
| Mixed dish             | Mixed | 2 | 2.0 ± 0.4 | -21.7 ± 2.8 |
| Sweetened/corn cereals | Mixed | 3 | 0.6 ± 3.0 | -17.3 ± 2.5 |

<sup>1</sup>Values are mean ± SD

<sup>2</sup> “Akutaq”, or Eskimo ice cream, is a traditional food, which is now commonly made with a mixture of market and traditional ingredients (vegetable shortening, sugar, and traditional or market fruits), and has therefore been classed as a “mixed” food item. It was traditionally made with seal oil or blubber.

<sup>3</sup>These fish species are known to live and feed completely, or partly in freshwater habitats.

<sup>4</sup>Isotope ratios for 42 of these food samples have been previously reported (24).

<sup>5</sup> Samples did not contain nitrogen, or contained too little nitrogen for accurate measurement.

<sup>6</sup> “Stink fish” is fermented fish.

<sup>7</sup> “Mouse food” are rodent caches of edible seeds and roots that are harvested from the tundra.

<sup>8</sup> “Condiments” includes items such as mayonnaise, mustard and soy sauce that do not contain large amounts of corn or cane sugar
